# Supplementary material for: The citrullinated/native index of autoantibodies against hnRNP-DL predicts an individual “window of treatment success” in RA patients
Source: Springer Nature journal article supplement (doi:10.1186/s13075-021-02603-x), 2021-09-14
Supplement: MOESM2 [file 13075_2021_2603_MOESM2_ESM.xlsx]

## Sheet: Tab1
Antigen	Autoantigen	Disease	Reference	PMID	Number of patients reactive ( n=26)	Sum of filter spots detected	Averaged intensity per filter spot
PECI_Peroxisomal 3,2-trans-enoyl-CoA isomerase (EC 5.3.3.8)(Dodecenoyl-CoA isomerase)(Delta(3),delta(2)-enoyl-CoA isomerase)(D3,D2-enoyl-CoA isomerase)	Yes	Renal cell carcinoma	Matthew et al. 1999	PMID: 10508479	4	22	523.064
HNRNPDL (Heterogeneous nuclear ribonucleoprotein D-like amino acid 81-420 )	Yes	SLE	Chang et al. 1999	PMID: 23642268	5	20	497.6
NT5C2_Cytosolic purine 5'-nucleotidase (EC 3.1.3.5)(5'-nucleotidase cytosolic II)	No				4	8	470.125
ANKS6_Ankyrin repeat and SAM domain-containing protein 6 (Sterile alpha motif domain-containing protein 6)(SamCystin)(Ankyrin repeat domain-containing prote...	No				9	18	323.456
STMN4_Stathmin-4 (Stathmin-like protein B3)(RB3)	No				10	50	283.276
ZNF133_Zinc finger protein 133	No				4	12	276.583
RPL14_60S ribosomal protein L14 (	Yes	SLE	Hasegawa et al. 2002	PMID: 12051391	5	18	271.433
ZNF91_Zinc finger protein 91	No				4	14	259.614
HIST1H1C_Histone H1.2	Yes	Rheumatic disease , Scleroderma, Connective tissue disease	Elkayam et al. 2005	PMID: 16040336	4	8	248.125
HDAC5_Histone deacetylase 5 (HD5)(EC 3.5.1.98)(Antigen NY-CO-9)	Yes	Cancer	Chan et al. 2010	PMID: 19795454	7	24	214.725
RPL21_60S ribosomal protein L21	No				11	40	208.765
PTN_PleiotrophNoin Precursor (PTN)(Heparin-binding growth-associated molecule)(HB-GAM)(Heparin-binding growth factor 8)(HBGF-8)(Osteoblast-specific factor 1...	No				7	27	206.856
MTA1_Metastasis-associated protein MTA1	No				6	18	183
MAZ_Myc-associated zinc finger protein (MAZI)(Purine-binding transcription factor)(Pur-1)(ZF87)(ZIF87		Cancer	Bataller et al. 2003	PMID: 12509857	11	52	182.265
BCL11A_B-cell lymphoma/leukemia 11A (B-cell CLL/lymphoma 11A)(COUP-TF-interacting protein 1)(Ecotropic viral integration site 9 protein homolog)(EVI-9)	No				4	8	181.925
BCL11B_B-cell lymphoma/leukemia 11B (B-cell CLL/lymphoma 11B)(Radiation-induced tumor suppressor gene 1 protein)(hRit1)(COUP-TF-interacting protein 2)	No				4	10	178.98
DIS3L2_DIS3-like exonuclease 2 (EC 3.1.13.-)	No				6	12	152.817
ZNF358_Zinc finger protein 358	No				5	10	143.82
FTH1_Ferritin heavy chain (Ferritin H subunit)(EC 1.16.3.1)(Cell proliferation-inducing gene 15 protein)	Yes	Takayasu arteritis	Große et al. 2014	PMID: 25178778	5	20	101.58
TRIO_Triple functional domain protein (EC 2.7.11.1)(PTPRF-interacting protein)	No				4	10	70.8
							RA Synovial fluid (SF)
